# Supplementary material for: Associations between Dietary Intake and Academic Achievement in College Students: A Systematic Review
Source: PubMed Central journal article supplement (PMC5746694; doi:10.3390/healthcare5040060), 2017-09-25
Supplement: healthcare-05-00060-s001.pdf [file healthcare-05-00060-s001.pdf]

**Supplementary Table S1.** Ovid Medline search strategy to identify diet and academic achievement studies in university or college students.

| #  | Searches                                                                                                                                          | Results |
|----|---------------------------------------------------------------------------------------------------------------------------------------------------|---------|
| 1  | (academic* adj5 (behavio?r* or performance* or achievement* or attain*)).mp.                                                                      | 5586    |
| 2  | (school* adj5 (performance* or achievement* or attain*)).mp.                                                                                      | 2802    |
| 3  | (scholastic* adj5 (behavio?r* or performance* or achievement* or attain*)).mp.                                                                    | 344     |
| 4  | Achievement/                                                                                                                                      | 13762   |
| 5  | Educational Measurement/                                                                                                                          | 30032   |
| 6  | Educational Status/                                                                                                                               | 42542   |
| 7  | 1 or 2 or 3 or 4 or 5 or 6                                                                                                                        | 88706   |
| 8  | Feeding Behavior/                                                                                                                                 | 41489   |
| 9  | food intake.mp. or Eating/                                                                                                                        | 65742   |
| 10 | (diet* adj5 (intake or behavio?r* or quality or pattern*)).mp.                                                                                    | 49452   |
| 11 | nutrition*.mp.                                                                                                                                    | 273337  |
| 12 | 8 or 9 or 10 or 11                                                                                                                                | 388610  |
| 13 | ((universit* or college* or tertiary or undergraduate* or postgraduate* or post graduate* or higher education) adj5 (student* or population)).mp. | 39155   |
| 14 | Universities/ and students/                                                                                                                       | 9990    |
| 15 | 13 or 14                                                                                                                                          | 40870   |
| 16 | 7 and 12 and 15                                                                                                                                   | 57      |
| 17 | limit 16 to english language                                                                                                                      | 47      |

Explanation of search terms:

- The truncation symbol (\*) retrieves all words beginning with the set of letters appearing before the symbol
- 'adj5' searches for both terms within five words of each other in either order.
- 'Mp' searches several fields at once: MP search looks in the Title, Original Title, Abstract, Subject Heading, Name of Substance, and Registry Word fields
- The forward slash symbol (/) means that the term is a valid controlled vocabulary term which has been searched in the Subject Headings field of the database.

**Supplementary Table S2.** Risk of bias of included studies

| Study             | Criteria 1 | Criteria 2 | Criteria 3 | Criteria 4 | Criteria 5 | Criteria 6 | Criteria 7 | Criteria 8 | Criteria 9 | Criteria 10 | Rating   |
|-------------------|------------|------------|------------|------------|------------|------------|------------|------------|------------|-------------|----------|
| Blai 1976 [1]     | Y          | N          | Y          | N          | N          | Y          | N          | Y          | N          | UC          | Neutral  |
| Deliens 2013 [2]  | Y          | Y          | Y          | UC         | Y          | Y          | Y          | Y          | Y          | Y           | Positive |
| Larouche 1998 [3] | Y          | Y          | N          | Y          | N          | Y          | Y          | N          | Y          | N           | Neutral  |
| Peltzer 2015 [4]  | Y          | Y          | Y          | N          | Y          | Y          | Y          | Y          | Y          | Y           | Positive |
| Phillips 2005 [5] | Y          | Y          | UC         | N          | UC         | N          | UC         | N          | Y          | UC          | Neutral  |
| Ruthig 2011 [6]   | Y          | Y          | Y          | Y          | Y          | Y          | Y          | Y          | Y          | N           | Positive |
| Trockel 2000 [7]  | Y          | Y          | Y          | Y          | Y          | Y          | Y          | Y          | Y          | Y           | Positive |

<sup>1</sup> Assessed as per the Academy of Nutrition and Dietetics Quality Criteria Checklist [8].

The criteria assess whether 1) the research question was clearly stated; 2) selection of study participants was free from bias; 3) study groups were comparable; 4) methods for handling withdrawals were detailed; 5) blinding of study participants/personnel was used; 6) intervention/exposure were described in detail; 7) outcomes were clearly defined and measurements valid and reliable; 8) statistical analyses were appropriate for study design and outcomes; 9) conclusions were consistent with results and with consideration to biases and limitations, and 10) funding and conflicts of interest were reported and likely to have introduced bias.

## References

1. Blai, B. Some biochemical correlates of academic achievement: College women--their eating habits and academic achievement. *Sci. Paedagog. Exp.* **1976**, *13*, 5-14.
2. Deliens, T.; Clarys, P.; De Bourdeaudhuij, I.; Deforche, B. Weight, socio-demographics, and health behaviour related correlates of academic performance in first year university students. *Nutr. J.* **2013**, *12*, 162.
3. Larouche, R. Determinants of college students' health-promoting lifestyles. *Clin. Excell. Nurse. Pract.* **1998**, *2*, 35-44.
4. Peltzer, K.; Pengpid, S. Correlates of healthy fruit and vegetable diet in students in low, middle and high income countries. *Int. J. Public. Health.* **2015**, *60*, 79-90.
5. Phillips, G.W. Does eating breakfast affect the performance of college students on biology exams? *J. Coll. Biol. Teach.* **2005**, *30*, 15-19.
6. Ruthig, J.C.; Marrone, S.; Hiadkyj, S.; Robinson-Epp, N. Changes in college student health: Implications for academic performance. *J. Coll. Stud. Dev.* **2011**, *52*, 307-320.
7. Trockel, M.T.; Barnes, M.D.; Egget, D.L. Health-related variables and academic performance among first-year college students: Implications for sleep and other behaviors. *J. Am. Coll. Health.* **2000**, *49*, 125-131.
8. Academy of Nutrition and Dietetics. *Evidence analysis manual: Steps in the academy evidence analysis process*; Chicago, IL, 2012.
